# Supplementary material
Source: PubMed Central journal article supplement (PMC6506361)
Supplement: NIHMS1022948-supplement-S1-4.pdf [file NIHMS1022948-supplement-S1-4.pdf]

**Cell Metabolism, Volume 29**

**Supplemental Information**

**Transcriptional Basis for Rhythmic**

**Control of Hunger and Metabolism**

**within the AgRP Neuron**

**Jonathan Cedernaes, Wenyu Huang, Kathryn Moynihan Ramsey, Nathan Waldeck, Lei Cheng, Biliana Marcheva, Chiaki Omura, Yumiko Kobayashi, Clara Bien Peek, Daniel C. Levine, Ravindra Dhir, Raj Awatramani, Christopher A. Bradfield, Xiaozhong A. Wang, Joseph S. Takahashi, Mohamad Mokadem, Rexford S. Ahima, and Joseph Bass**

## A Reduced *Bmal1* Expression (Exon 7-9) in Hypothalamus of *BKO* Mice

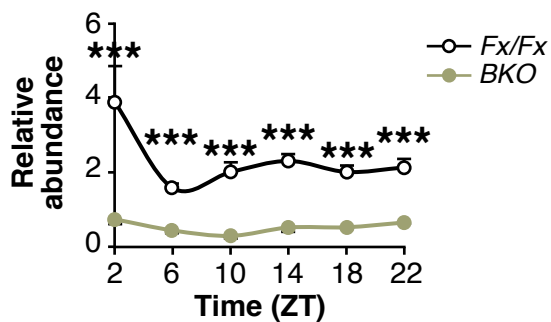

## B Genetic Loss of BMAL1 in *BKO* Hypothalamus

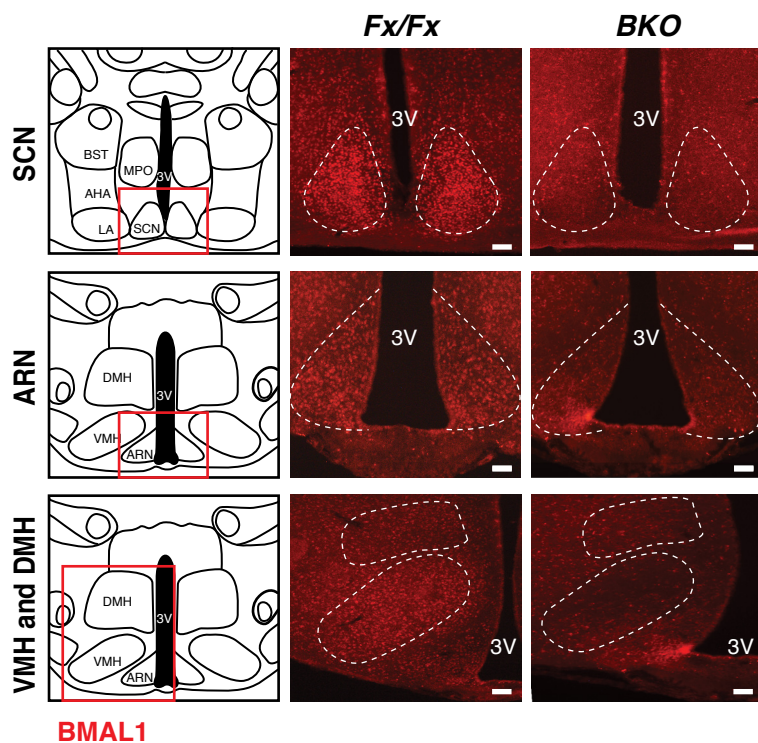

## C Disrupted Activity Rhythms in *BKO* Mice

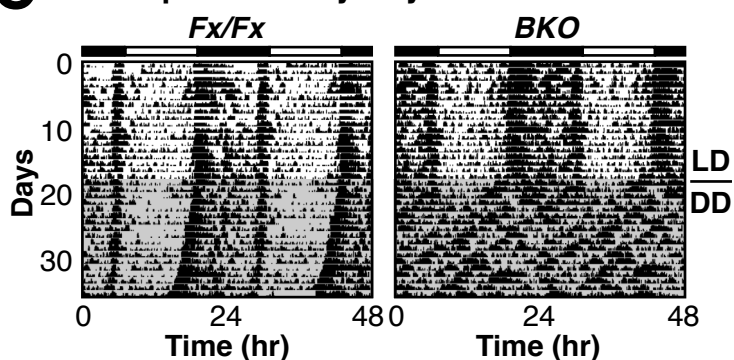

## D Increased Adiposity in *BKO* Mice

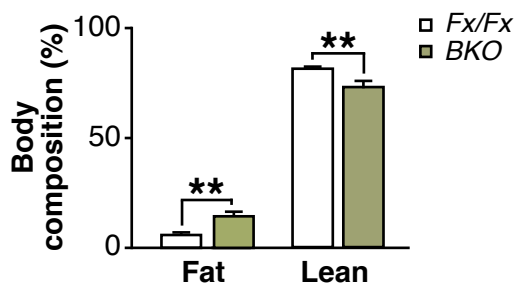

## E Increased Body Weight in *BKO* Mice

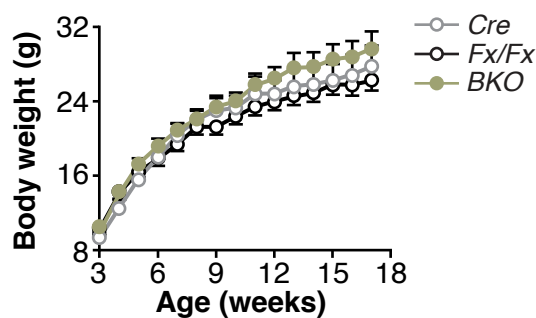

## F Rebound Feeding Depends on Time of Day

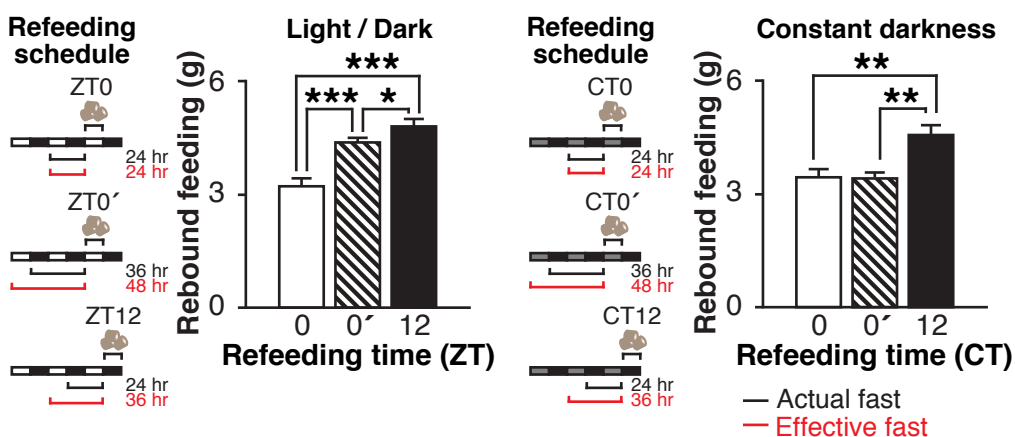

## G Disrupted Rebound Feeding Rhythms in *BKO* Mice

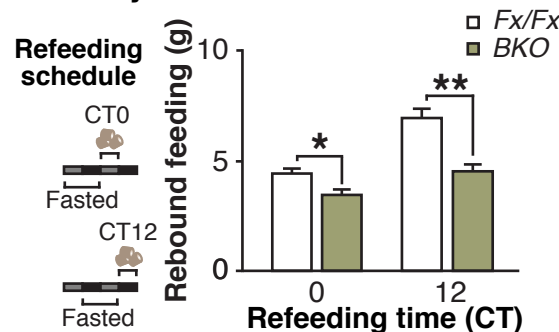

**Figure S1. Genetic ablation of BMAL1 in hypothalamus impacts adiposity and time-of-day-dependent hunger. Related to Figure 1. (A)** Relative abundance of mRNA (by qPCR) encoding the targeted *Bmal1* exon in mediobasal hypothalami of *Bmal1<sup>fx/fx</sup>* (white) and *BKO* (green) mice (n=3-4). **(B)** BMAL1 expression (red) in neurons of the suprachiasmatic nucleus (SCN, arcuate nucleus (ARN), ventromedial hypothalamus (VMH), and dorsomedial hypothalamus (DMH) (outlined in white dotted lines), as assessed by immunohistochemistry. Scale bar represents 100  $\mu$ m. **(C)** Representative actograms from *Bmal1<sup>fx/fx</sup>* and *BKO* mice. Activity counts are indicated by vertical black marks in the activity record. The records are double-plotted so that each day's record is presented on both left and right, and beneath that of the previous day. Mice were maintained on a 12:12 LD schedule for 18 days prior to being transferred to constant darkness (DD) on the day indicated by a horizontal line in the margin. **(D)** Body composition (fat and lean mass) (n=7-8) and **(E)** body weight trajectory in *ad lib*-fed *Bmal1<sup>fx/fx</sup>*, *Camk2 $\alpha$ -Cre*, and *BKO* mice; *BKO* mice were significantly heavier than both the *Camk2 $\alpha$ -Cre* (p<0.04) and *Fx/Fx* (p<0.001) mice by Tukey's multiple comparison test (n=2-11). **(F)** Amount of rebound feeding (i.e., food intake in the 12 hrs after re-introduction of food following a fast) in wild-type (WT) mice when refeeding starts at ZT0 (i.e., lights on) following either a 24-h fast (white) or an extended 36-h fast (striped) or at ZT12 (i.e., lights off) following a 24-h fast (black) (n=8). The refeeding schedule on the left highlights the researcher-imposed fasting ("actual fast"), as well as the "effective fast", i.e., the fact that mice will primarily be fasting during preceding *ad lib* light periods. Comparable rebound feeding in WT mice held in constant darkness (DD) is shown on the right (n=5). **(G)** Amount of rebound feeding in *Bmal1<sup>fx/fx</sup>* and *BKO* mice following refeeding in constant darkness (DD) at CT0 and CT12 (n=4-5). Data are represented as mean  $\pm$  SEM (\*p<0.05, \*\*p<0.01, \*\*\*p<0.001).

### A Altered Glycogen Levels in *BKO* Mice

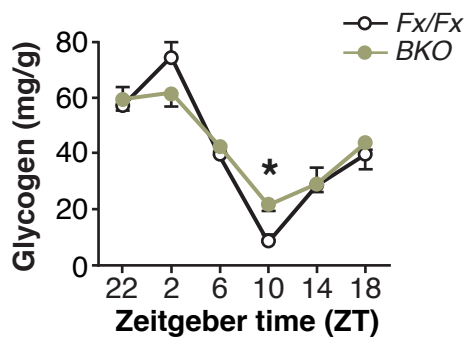

### B Phase-Shifted Gene Expression Profiles of Metabolic and Lipogenic Transcripts in *BKO* Mice

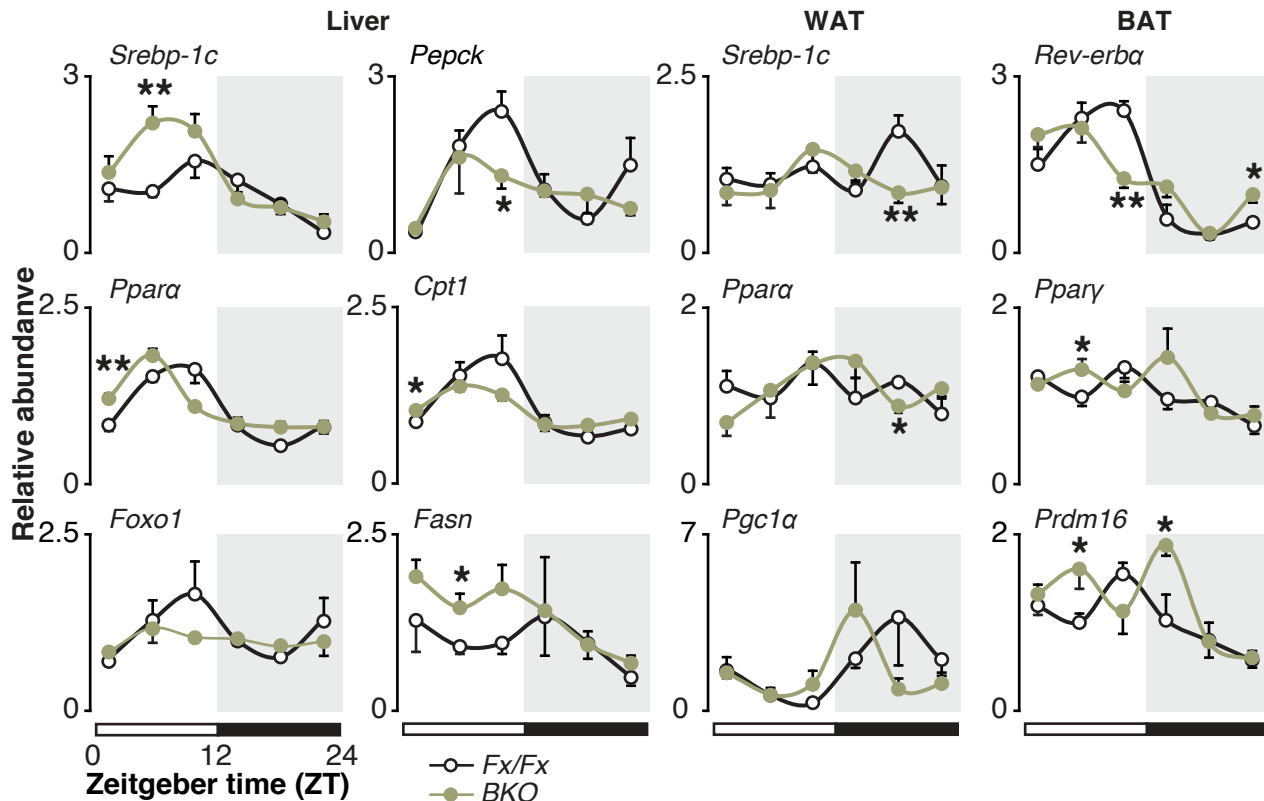

### C Diurnal Gluconeogenesis Control in WT Mice

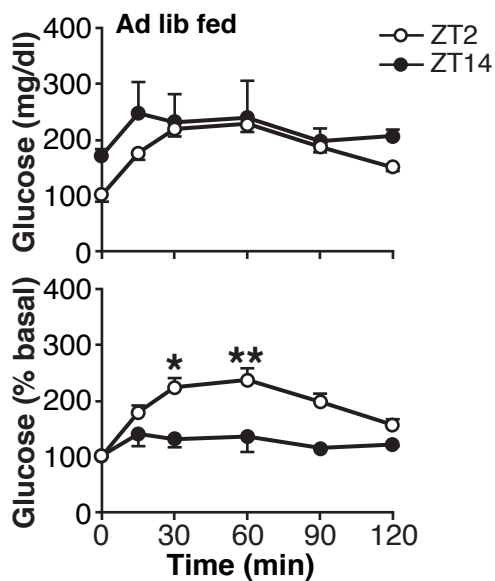

### D *Cre*-Only Mice Behave Similarly to *Fx/Fx* Mice During Pyruvate Challenge

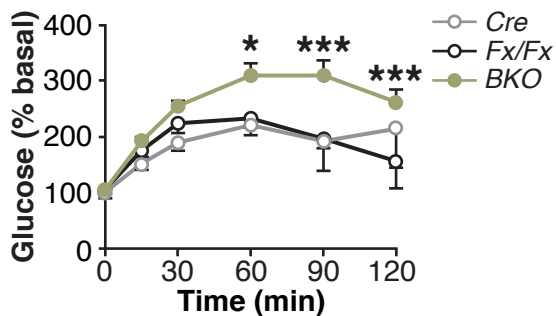

### E Normal Gluconeogenesis During the Dark Period in *BKO* Mice (ZT14)

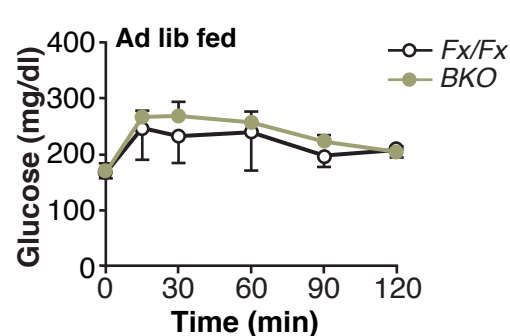

**Figure S2. Neuronal clock regulates time-of-day-dependent metabolism. Related to Figure 1. (A)** 24-h glycogen levels (n=3-4) in *Bmal1<sup>flx/flx</sup>* and *BKO* mice. **(B)** 24-h mRNA expression of metabolic transcription factors and lipogenic and gluconeogenic genes in *ad lib*-fed *Bmal1<sup>flx/flx</sup>* and *BKO* mice in liver, white adipose tissue (WAT), and brown adipose tissue (BAT) (n=3-4). **(C-E)** Time course of plasma glucose levels following an intraperitoneal injection of pyruvate (2 mg/kg) in **(C)** fasted WT mice at ZT2 (open circles) and ZT14 (closed circles) (n=3-10) (left panel: absolute glucose values, ANOVA time effect p=0.0035; right panel: fold change from pre-injection baseline, ANOVA ZT2 vs ZT14 effect: p<0.0001); **(D)** fasted *Bmal1<sup>flx/flx</sup>*, *Camk2 $\alpha$ -Cre*, and *BKO* mice at ZT2 (n=2-14) (*BKO* vs. *Bmal1<sup>flx/flx</sup>*: ANOVA genotype effect: p<0.0001; post-hoc *BKO* vs. *Bmal1<sup>flx/flx</sup>* differences at indicated timepoints) and **(E)** fasted *Bmal1<sup>flx/flx</sup>* and *BKO* mice at ZT14 (n=7) (ANOVA genotype effect: p=0.31). Data are represented as mean  $\pm$  SEM (\*p<0.05, \*\*p<0.01, \*\*\*p<0.001).

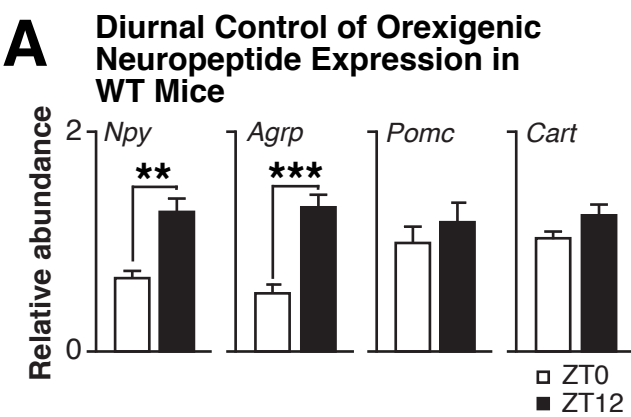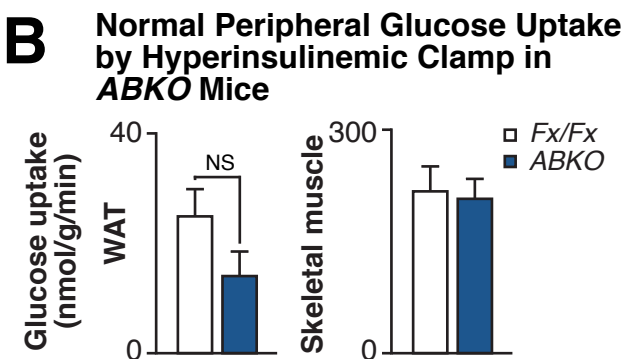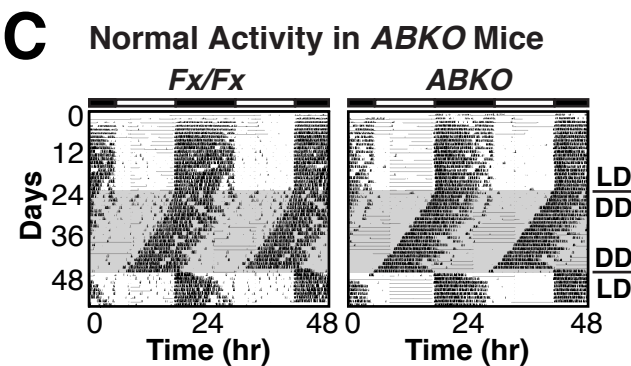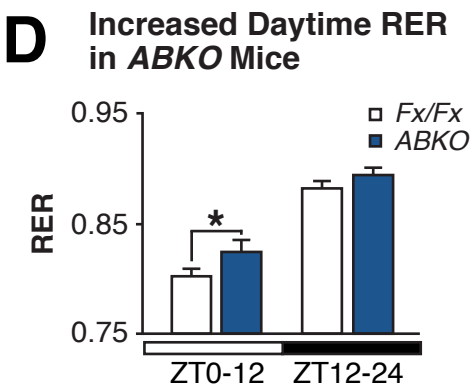

**E** Purity of AgRP Neuron Samples, Assessed by Comparison with Other CNS Cell Types

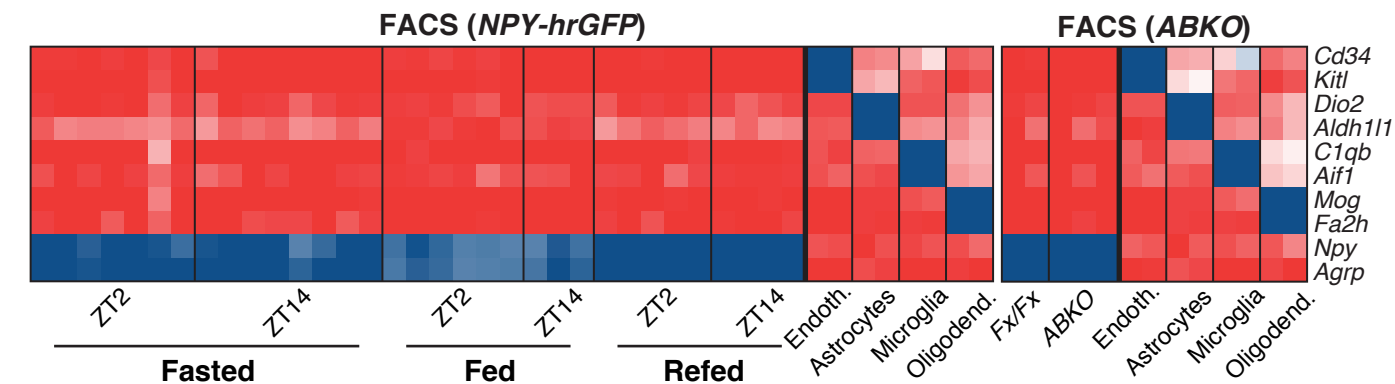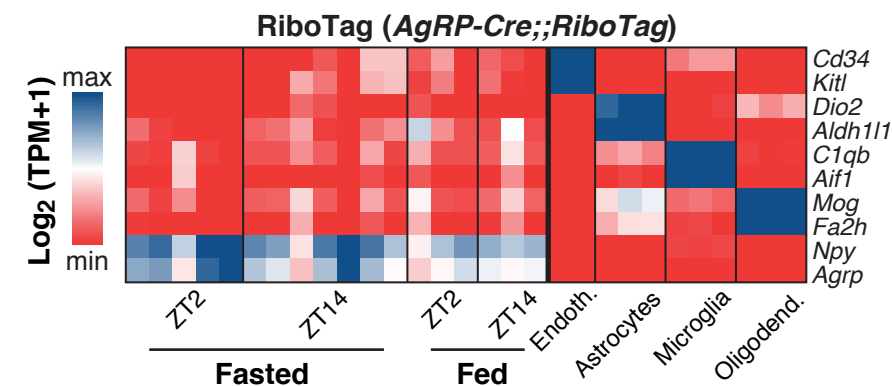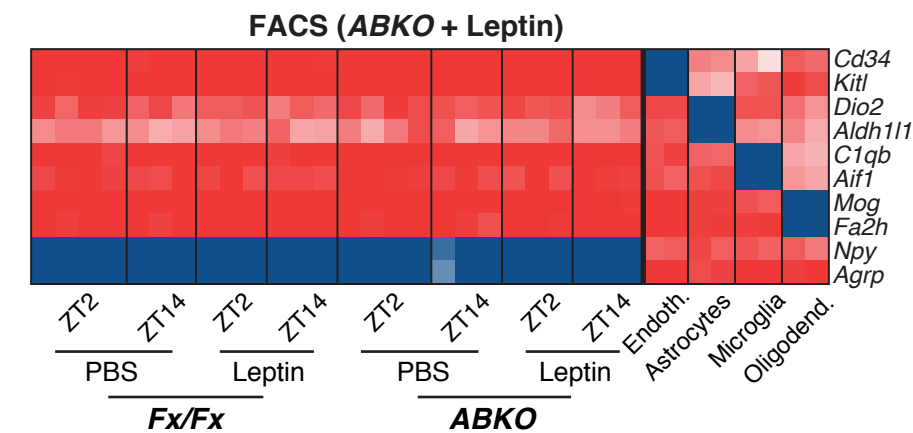

**F** Diurnally Regulated Pathways in AgRP Neurons at the Ribosomal mRNA Level

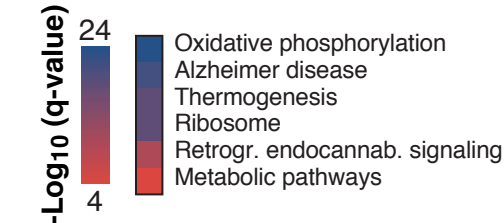

**G** Time-of-Day Clock and Metabolic Gene Changes by Fasting vs Feeding

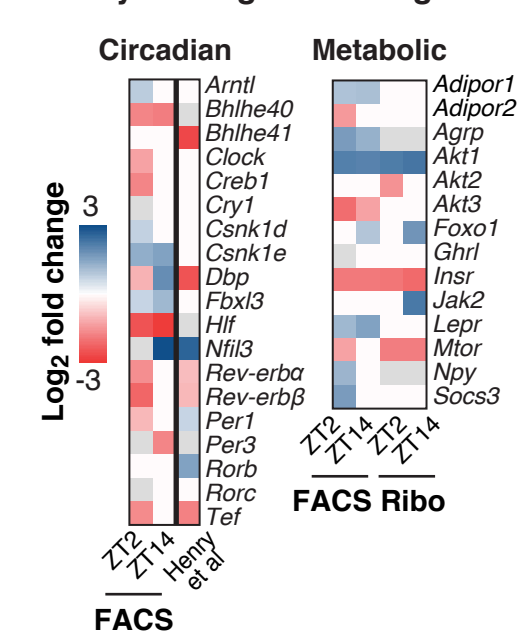

**Figure S3. Loss of clock in AgRP neurons leads to increased food consumption, RER, and body weight, and FACS and RiboTag samples show enrichment of neuron-specific markers. Related to Figures 2-4. (A)** mRNA expression of neuropeptides in WT mice fasted for 24 h and collected at the onset of either the light (ZT0) or dark (ZT12) period (n=7). **(B)** Glucose uptake in WAT (p=0.15, two-tailed unpaired student's t-test) and skeletal muscle as assessed by hyperinsulinemic clamp in *Bmal1<sup>fx/fx</sup>* and *ABKO* mice (n=5-9). **(C)** Double-plotted locomotor activity (based on wheel activity) in *Bmal1<sup>fx/fx</sup>* and *ABKO* mice, under normal (12:12) light/dark conditions (LD), as well as under constant darkness (DD) (n=6-8). **(D)** Respiratory exchange ratio (RER) values ( $VCO_2/VO_2$ ) in the light (ZT0-12) and dark (ZT12-24) period in *Bmal1<sup>fx/fx</sup>* and *ABKO* mice (n=5-7) (ANOVA, ZT0-24, genotype effect, p=0.0145, Sidak's multiple comparison test ZT0-12, p=0.0482, ZT12-24: p=0.35). Data are represented as mean  $\pm$  SEM (\*p<0.05, \*\*p<0.01, \*\*\*p<0.001). **(E)** Purity of individual FACS and RiboTag samples in Figures 2-4, as assessed by comparison with previously published cell type-specific FACS data from endothelial cells, astrocytes, microglia, and oligodendrocytes (Avey et al., 2018; Haimon et al., 2018; Sun et al., 2017; Zhang et al., 2014). Showing enriched markers at the maximum transcripts per million (TPM; log<sub>2</sub>-transformed) per cell type for indicated conditions for both FACS and RiboTag samples. **(F)** KEGG pathways that were significantly enriched (FDR<0.05) in analyses of *AgRP-Cre*; *RiboTag* mice fasted at ZT2 versus ZT14. **(G)** Changes in circadian clock genes in response to fasting versus *ad lib* feeding in *NPY-hrGFP* mice at ZT2 and ZT14. Also shows the corresponding data from AgRP neurons from (Henry et al., 2015).

## A Transcription Factor Motifs Induced by Fasting vs Feeding at the Whole Cell and Ribosome Level at Morning and Evening

### FACS (NPY-hrGFP), ZT2

| Consensus seq.      | Motif    | Q-val  |
|---------------------|----------|--------|
| GGCCCCGCCCCF        | SP1      | 0.0000 |
| TGCCTCAGCCCTTTC     | KLF3     | 0.0000 |
| GACTACAATGCCAGAAFC  | RONIN    | 0.0001 |
| AACTACAATGCCAGAAIGC | GFY-STAF | 0.0002 |
| AGTGGCGGGAGC        | SP5      | 0.0002 |
| ACTACAATGCC         | GFY      | 0.0004 |
| GTACAGTGT           | USF2     | 0.0005 |
| CCGTACAGTGA         | E-BOX    | 0.0027 |
| GCAGTGTG            | bHLHE40  | 0.0042 |
| GTGGGCGGGC          | KLF14    | 0.0062 |
| GTACAGTGAFTC        | TFE3     | 0.0070 |
| AITCCCAFAAIFCF      | ZNF143   | 0.0147 |
| GAFTTCCGT           | ELK4     | 0.0147 |
| TGICAT              | TGIF2    | 0.0153 |
| AGCCAATCG           | NFY      | 0.0175 |
| GAFTTCCGT           | ELK1     | 0.0190 |
| GTACAGTGA           | USF1     | 0.0451 |
| TGGGFTGGCC          | KLF6     | 0.0451 |
| GGGGGGG             | MAZ      | 0.0451 |
| CAAGATGGCGC         | YY1      | 0.0451 |

### RiboTag (AgRP-Cre;;RiboTag), ZT2

| Consensus seq. | Motif  | Q-val  |
|----------------|--------|--------|
| TACTTCCGT      | ELK4   | 0.0000 |
| TACTTCCGT      | ELK1   | 0.0000 |
| TACTTCCGT      | FLI1   | 0.0000 |
| AACCGGAAGT     | GABPA  | 0.0000 |
| AACCGGAAGT     | ETV1   | 0.0002 |
| AACCGGAAGT     | ELF1   | 0.0003 |
| ACAGGAAGT      | ETS1   | 0.0003 |
| GGCCCCGCCCCF   | SP1    | 0.0005 |
| AACCGGAAGT     | ETS    | 0.0012 |
| CAAGATGGCGC    | YY1    | 0.0028 |
| AGCCAATCG      | NFY    | 0.0197 |
| TCTAATAAAA     | HOXD13 | 0.0252 |
| ACTGGGCGGAGC   | SP5    | 0.0322 |
| GAFTTCCGT      | ETV2   | 0.0391 |
| CTGTCAATCA     | PBX3   | 0.0468 |

### RiboTag (AgRP-Cre;;RiboTag), ZT14

| Consensus seq. | Motif | Q-val  |
|----------------|-------|--------|
| GGCCCCGCCCCF   | SP1   | 0.0438 |

### FACS (NPY-hrGFP), ZT14

| Consensus seq. | Motif  | Q-val  |
|----------------|--------|--------|
| CTGTCAATCA     | PKNOX1 | 0.0622 |
| CTGTCAATCA     | PBX3   | 0.0622 |

## B Transcription Factor Motifs Induced by Refeeding vs Fasting at the Whole Cell Level at Morning and Evening

### FACS (NPY-hrGFP), ZT2

| Consensus seq.      | Motif    | Q-val  |
|---------------------|----------|--------|
| AACTACAATGCCAGAAIGC | GFY-STAF | 0.0233 |
| AACTACAATGCCAGAAFC  | RONIN    | 0.0233 |
| GGCCCCGCCCCF        | SP1      | 0.0233 |
| ACTACAATGCC         | GFY      | 0.0284 |

### FACS (NPY-hrGFP), ZT14

| Consensus seq. | Motif  | Q-val  |
|----------------|--------|--------|
| CTGTCAATCA     | PKNOX1 | 0.3124 |
| CTGTCAATCA     | PBX3   | 0.3127 |
| GGCCCCGCCCCF   | SP1    | 0.3127 |

## C Altered Leptin Rhythms in BKO Mice

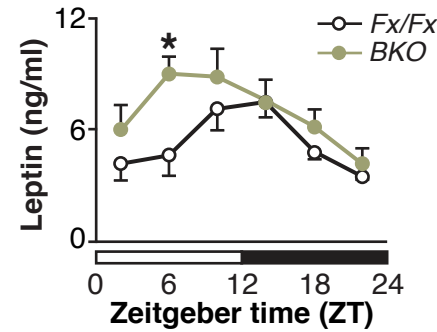

## D Time-of-Day Dependent Differences in Leptin Levels After Fasting in WT Mice

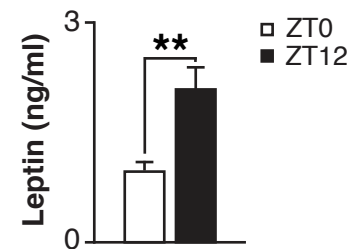

## F Time-of-Day Dependent Differences in Phosphorylation of STAT3 in WT Mice

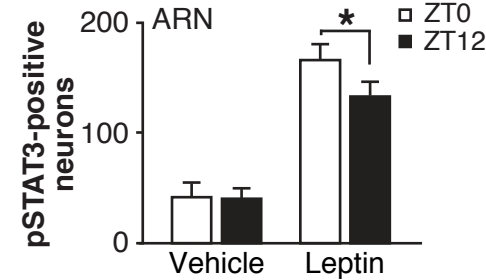

## G Time-of-Day and Clock Dependent Transcriptional Response to Leptin in AgRP Neurons

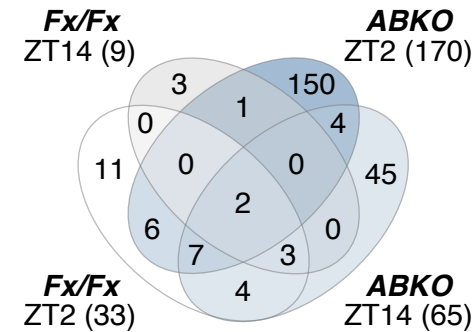

## E Time-of-Day Dependent Differences in Leptin Sensitivity in WT Mice

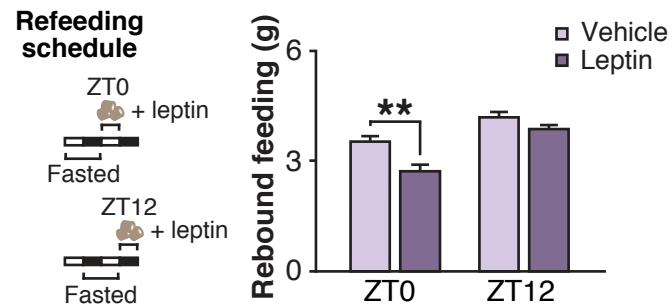



**Figure S4. Transcription factor (TF) motif analysis reveals enrichment of nutrient-responsive TFs related to mitochondrial function, and *BKO* mice display altered leptin sensitivity. Related to Figures 3-4.** TF motif analyses reveal significantly enriched consensus sequences and their associated TFs, both in **(A)** FACS and RiboTag analyses at ZT2 and ZT14 in fasted versus feeding and **(B)** FACS analyses at ZT2 and ZT14 following time-restricted feeding. **(C)** Leptin levels measured every 4 h in *ad lib*-fed *Bmal1<sup>fx/fx</sup>* and *BKO* mice (n=3-5). **(D)** Leptin levels in WT mice at either ZT0 or ZT12 following a 24-h fast (n=5-7). **(E)** Amount of rebound feeding (g) in WT mice following a 24-h fast when refeeding (measured over 11 hours) starts at either ZT0 (left bars) or ZT12 (right bars), at the same time that either vehicle or leptin (10 mg/kg) is injected (n=7-8). **(F)** pSTAT3-positive neurons at ZT0 versus ZT12 following either vehicle or leptin administration in the arcuate nucleus (n=5-6). **(G)** Venn diagram indicating numbers of genes whose expression changed due to either time of day (ZT2 versus 14) or genotype (*Bmal1<sup>fx/fx</sup>* versus *ABKO* mice) in response to acute leptin (2 mg/kg) administration. Data are represented as mean  $\pm$  SEM (\*p<0.05, \*\*p<0.01).
